# Supplementary material for: Lung Ultrasound Diagnostic Accuracy in Neonatal Pneumothorax
Source: Can Respir J. 2016 May 3;2016:6515069. doi: 10.1155/2016/6515069 (PMC4904536; doi:10.1155/2016/6515069)
Supplement: Supplementary file 1 — Clip # 1: Note the absence of lung sliding due to the presence of PTX. Clip # 2: Note the lung point in the middle of the screen. [file 6515069.f1.zip]

Archive with 2 entries (2 files):
- lung_point_RDS.mp4
- ptx_no_sliding.mp4
